# Supplementary material for: Long-Chain Fatty Acid Combustion Rate Is Associated with Unique Metabolite Profiles in Skeletal Muscle Mitochondria
Source: PLoS One. 2010 Mar 24;5(3):e9834. doi: 10.1371/journal.pone.0009834 (PMC2844415; doi:10.1371/journal.pone.0009834)
Supplement: Table S2 — Complete listing of metabolites detected in each condition according to criteria described in Methods. (0.16 MB XLS) [file pone.0009834.s004.xls]

## Sheet: Sheet1
Seifert et al.
Long-chain fatty acid combustion rate is associated with unique metabolite profiles in skeletal msucle mitochondria
Table 2S - Values are mean % change of 20 min. value from 0 min value (top value), SEM (middle value) and P value (lower value)
	by paired t-test for each of the 5 incubation conditions (0, 2, 9 and 19 uM palmitate; 9 uM palmitate plus inhibitors). Means and SEM were
	calculated as the antilog of the difference of log transformed values. Value in pink: mean value shows increase over 20 min. incubation;
	values in blue: mean value is reduced after 20 min. incubation; increases and decreases are shown irrespetive of P value.
	*: indicates that an outlier was removed (see Methods); this was only done for a total of 11 comparisons.
				BUFFER						MATRIX
	Condition, uM Palm	0	2	9	19	9 + inh		0	2	9	19	9 + inh
Functional class	Metabolite
TCA cyle	Citric acid	-15.8951	184.375	86.9756	89.5831	-1.32569		-31.0338	-12.752	27.4419	714.85	52.2364
		93.4815	5.9742	17.0822	65.402	57.8284		33.5076	47.0833	38.7547	61.3139	94.1357
		0.801881	5.58576e-05	0.0285995	0.250727	0.977618		0.26793	0.738085	0.500192	0.0118093	0.54977
	α-Ketoglutaric acid	398.383	56.7594	473.695	1475.19	39.1419		-30.576	40.77*	11.4835	-19.9205	3.03852
		36.7426	22.6848	44.7001	80.5591	66.9026		60.2554	13.0721	43.3057	32.0918	40.3145
		0.00215116	0.0927761	0.0179307	0.00344652	0.542871		0.482223	0.0496434	0.777617	0.469479	0.932458
	Succinic acid	178.517	10.27	15.2048	33.1538	10.8619		65.9879	-19.3484	34.3087	42.9597	33.1902
		27.3939	16.7809	26.279	31.7901	21.6789		57.8191	27.06	15.1166	17.5489	33.8604
		0.00549593	0.562776	0.586924	0.339583	0.618069		0.329	0.410399	0.104201	0.0915817	0.363665
	Malic acid	-88.5742	-80.6526	-87.3735	-88.8607	-5.49505		-12.8954	-62.4258	-0.949863	51.3339	322.979
		28.6499	14.615	33.2339	57.8229	23.2516		73.883	48.1562	56.1692	12.1379	57.0229
		0.000134962	0.000272692	0.00549592	0.00297108	0.795952		0.815218	0.0551539	0.983944	0.0224242	0.0186915
Amino acids	Tyrosine	-54.8351	113.277	-10.5791	30.1016	18.9186		-69.6541	-53.6798	-27.5088	-53.0173	-71.7069
		93.6941	46.5275	29.3042	38.3657	14.2834		114.913	136.48	27.1572	21.4407	118.681
		0.27454	0.118455	0.692901	0.448677	0.242015		0.19407	0.412209	0.251592	0.017711	0.15774
	Tryptophan	-59.5146	346.899	29.247	33.1941	40.4089		-50.1139	-49.7385	-17.5499	-68.8481	-50.6357
		75.0557	69.6887	31.7688	40.6126	76.099		121.798	79.8506	23.1624	18.2189	72.863
		0.157463	0.0472841	0.420991	0.432592	0.570607		0.431937	0.293986	0.406724	0.00222955	0.244602
	Phenylalanine	-26.1144	89.5797	49.7446	60.5558	187.77		-28.189	-32.6605	-17.6729	-44.3519	-81.3497
		42.2993	36.9948	17.4931	23.328	36.0675		57.9124	34.9293	40.3524	14.4399	69.0624
		0.423862	0.111949	0.0873541	0.0647168	0.0139368		0.50871	0.24406	0.596899	0.0121998	0.0186449
	Isoleucine	-31.1088	-31.2307	25.6254	-0.378427	51.8973		-73.1096	-44.291	215.61	-54.873	-79.5873
		86.5751	61.7099	11.3618	62.9068	100.213		103.137	175.009	110.533	57.7711	87.4104
		0.572016	0.479494	0.12419	0.994053	0.569101		0.137475	0.588129	0.197508	0.155919	0.0446946
	Lysine	-55.2255	33.0353	-0.858562	-20.5722	-1.36876		-88.2385	-91.7916	-78.2443	-91.8762	-88.5926
		95.3364	74.7411	60.7818	26.9909	46.944		180.672	241.508	38.1568	123.349	142.859
		0.275331	0.635992	0.986653	0.372316	0.972596		0.106754	0.0974246	0.00917785	0.0353883	0.0500204
	Glycine	-55.6073	30.4177	-10.1438	5.17094	-14.2112		-26.3802	2.59452	10.3523	-39.8694	-30.7685
		74.7338	31.818	37.4935	20.0516	19.5531		28.3523	17.338	21.8578	7.11417	41.5459
		0.195876	0.390821	0.759051	0.791899	0.423688		0.28712	0.878993	0.64442	0.00177762	0.330649
	Serine	-36.1847	-9.76981	-49.3981	-55.4796	17.2856		-65.0003	-71.4578	92.2809	-46.1718	-63.5712
		161.914	148.056	18.3499	95.7843	99.074		72.2903	135.31	120.971	41.5127	89.4035
		0.657308	0.915354	0.0272309	0.273756	0.824563		0.125845	0.202771	0.455936	0.149021	0.164958
Fatty acids	Arachidic acid	-50.6097	14.875	-35.3343	-40.9938	101.208		33.7105	-37.9562	-11.318	-1.34909	-16.1118
		40.7431	17.2568	41.7705	45.9767	15.713		51.875	20.8177	29.6435	48.9321	22.5544
		0.0845833	0.432866	0.300257	0.212596	0.00302942		0.525214	0.0529128	0.66766	0.974431	0.42088
	Elaidic acid (put)	-11.5634	21.1709	-36.3178	-41.7113	65.4883		74.8481	8.75685	-56.4645	-28.9495	37.2408
		58.9937	69.3378	61.5162	54.8137	17.0244		55.677	121.425	143.219	118.654	72.8765
		0.79987	0.733884	0.416018	0.262994	0.018503		0.275395	0.920004	0.402425	0.684749	0.584097
	Linoleic acid	18.6388	67.0748	-10.5572	-7.52056	53.3317		131.767	53.4938	-21.5171	-39.8393	60.9802
		16.4991	19.3603	33.3778	13.8451	20.4258		81.0802	28.9274	23.1007	28.7895	50.2616
		0.305859	0.0441082	0.724323	0.568616	0.061124		0.229812	0.152519	0.308472	0.115005	0.286662
	Oleic acid	-0.0668999	41.6061	-11.6433	-22.2648	29.9592		63.8874	5.14223	-35.9887	-35.7907	18.3678
		20.1664	20.0694	45.4488	24.9325	26.1439		53.3198	24.5058	41.1855	14.6263	38.4141
		0.997212	0.129936	0.762822	0.301055	0.30228		0.312037	0.828105	0.2655	0.0315122	0.622521
	Stearic acid	-44.7908	29.6987	-44.0843	-36.6535	43.0136		17.3801	-54.3355	-25.298	-12.2345	12.5547
		22.2527	14.8723	28.8	16.9179	18.2413		37.1469	42.7934	36.9647	40.3166	30.8679
		0.0253946	0.133971	0.105287	0.0265982	0.0766561		0.638635	0.0790531	0.406289	0.719651	0.675596
	Palmitoleic acid	-5.98228	102.144	-31.0445	-2.95806	33.175		-24.1145	50.9581	-34.0858	-24.6227	24.453
		57.5542	51.576	104.318	26.6611	33.4346		47.3322	63.2594	35.0946	15.3919	33.0803
		0.8965	0.165867	0.638854	0.903054	0.358941		0.515746	0.439122	0.238099	0.119565	0.473018
	Palmitic acid	-18.8653	25.1456	-70.1616	-82.6383	-10.4249		22.2233	-28.5692	-39.2464	-30.6747	50.0536
		15.5033	14.2289	31.4789	13.7097	18.9381		52.9212	32.0856	11.4567	24.7923	61.5691
		0.197108	0.167056	0.0215136	9.6927e-06	0.548995		0.661221	0.280709	0.0100727	0.173441	0.430056
	Myristic acid	-16.254	69.5592	-26.1256	1.68087	66.0325		-7.71796	15.924	-28.1095	-22.2378	12.5956
		17.7053	17.502	36.7495	20.5743	38.7549		35.9364	25.4763	16.918	23.542	37.0032
		0.318298	0.0306763	0.404667	0.931907	0.172602		0.806536	0.543717	0.102322	0.299954	0.719282
	Lauric acid	5.94491	60.8749	-28.3863	-1.86852	12.5277		43.9801	59.7584	-25.0188	-6.81805	30.1938
		27.8693	29.5612	54.5393	21.1929	25.0893		68.01	23.1139	30.7941	39.381	52.956
		0.822093	0.14027	0.498887	0.925025	0.616937		0.521086	0.0739957	0.343867	0.841981	0.557524
	Capric acid	3.72998	44.8374	-3.83153	-14.6013	36.521		8.41103	40.76	-2.81508	-35.3367	38.0366
		26.327	26.2423	44.0804	28.165	27.7405		49.8927	17.2615	25.2441	18.2388	35.621
		0.880622	0.187117	0.921559	0.548213	0.250605		0.851581	0.0845621	0.905176	0.059904	0.330803
Ketone body	3-Hydroxybutanoic acid	37.7525	115.533	106.981	135.59*	249.23		19.786	-2.03862	-65.0823	-73.0873	-45.5913
		32.6309	28.876	123.488	22.9626	30.0304		26.2146	59.6371	68.4145	43.9111	55.5986
		0.299996	0.0388871	0.432368	0.00894882	0.00311912		0.481363	0.966581	0.113687	0.0226427	0.217772
Lipid species	Cholesterol	15.4028	74.2412	-3.99231	-36.2578	21.2986		14.2476	19.8423	-7.76623	-57.2876	188.145
		23.9526	18.1477	20.5339	78.2971	31.1343		59.4268	12.3556	23.8266	53.8151	90.9098
		0.529478	0.0291153	0.841308	0.465733	0.502993		0.789379	0.180963	0.724439	0.119394	0.152823
	Putrescine	50.7324	29.2664	-35.3694	-24.6623	31.4965		-30.7358	60.3211	5.87387	-13.034	29.2243
		53.6552	13.2256	21.2674	23.1897	28.2079		22.4921	11.781	50.933	15.7479	24.6498
		0.376319	0.107636	0.108566	0.223349	0.312721		0.144518	0.00818423	0.896425	0.393689	0.288772
	1-Hexadecanol	-20.4513	78.6193	-1.52271	-34.1709	13.1974		-43.8502	69.1355	-6.70858	-50.5212	-2.56403
		15.1141	40.4326	48.8791	12.2764	21.8699		48.957	36.0358	30.4313	9.56758	49.9208
		0.155173	0.162753	0.971666	0.0112201	0.5539		0.221096	0.148404	0.806707	0.00153007	0.950938
	Octadecanol	-34.6025	70.0757	-5.70448	-8.21239	25.558		-37.012	46.0371	9.11024	-46.6395	-36.1997
		56.88	73.5003	21.876	23.3536	34.2432		42.2693	26.8414	20.0813	26.6833	33.1113
		0.38204	0.389716	0.785914	0.697235	0.468941		0.260028	0.172107	0.658616	0.0566504	0.167173
	Heptadecanoic acid	-31.9247	51.1013	-28.1539	-34.2157	31.942		15.5611	-30.4999	-19.4809	-24.3002	-6.96441
		29.2773	18.0372	22.1558	17.3993	24.3598		46.807	26.8479	16.2118	27.5607	28.397
		0.184896	0.0675432	0.197069	0.0400811	0.250622		0.725535	0.186592	0.22272	0.316554	0.782451
	1-Monostearin	6.66955	75.3138	-2.51577	30.9939	-7.53433		105.816	13.0115	24.7778	-32.7578	-31.0289
		25.2523	36.5504	30.017	23.5356	48.5126		65.1376	17.9299	15.6765	47.2699	59.7863
		0.783945	0.145876	0.928795	0.248676	0.849538		0.223553	0.491622	0.203126	0.3632	0.458176
	Butyl stearate	-21.3356	350.85	22.6863	-31.4928	-80.9936		-51.6554	-67.4456	66	-62.6822	-73.0832
		107.151	89.1204	369.32	111.585	167.459		256.615	179.546	259.541	81.6515	126.498
		0.752964	0.0773789	0.903165	0.631783	0.14243		0.598163	0.324757	0.712281	0.174019	0.159556
	Pentadecanoic acid	-16.9884	112.965	-36.5521	-21.0034	25.532		2.37352	40.2176	-16.0642	-43.8155	18.1508
		49.3097	44.473	62.586	21.3918	27.9673		59.2969	31.8512	36.6026	27.0256	41.8445
		0.658677	0.109111	0.418302	0.269577	0.392053		0.962233	0.275997	0.60446	0.0735507	0.650141
	Pelargonic acid	18.5234	10.6642	-2.74412	-27.7886	26.151		-31.5562	-1.93752	15.3027	-17.9014	-21.8463
		26.6657	8.07452	40.8443	22.0155	35.5594		36.4896	23.717	25.0226	27.4221	36.1032
		0.499216	0.261919	0.940365	0.152909	0.474066		0.289865	0.930323	0.558407	0.46135	0.454388
Pentose	Ribulose-5phosphate	68.5885	-9.53226	89.1027	-46.2803	142.915		18.1139	32.9817	38.6501	-10.1094	-54.0255
		40.0619	49.8036	40.8083	26.5271	41.7684		24.6899	39.1398	26.0481	10.3097	113.984
		0.172066	0.816441	0.159565	0.0384893	0.0439079		0.492555	0.427607	0.230903	0.33848	0.346428
	Ribose-5-phosphate	90.4303	-18.4192	-25.3738	-13.6703	106.629		-36.2419	121.506	-36.8112	5.13826	-18.7004
		55.2709	70.4661	71.7127	16.9633	50.3294		133.327	36.487	26.3127	7.92898	81.061
		0.193557	0.722107	0.625886	0.384386	0.125325		0.623406	0.0508511	0.120837	0.547252	0.739202
Carbohydrates	Trehalose	-20.451	-3.93915	-29.3927	-34.4996	11.4926		-4.79574	5.11709	26.9167	-22.7479	-30.8501
		41.0293	27.8765	57.6523	30.3348	23.1273		27.7252	19.2879	21.8355	6.13668	28.8545
		0.530467	0.8781	0.50018	0.161371	0.619785		0.850629	0.788552	0.293969	0.0123151	0.195876
	Fructose	-42.8434	104.036	-54.0569	-12.8836	42.028		-69.9019	-18.0268	42.3311	-41.0245	-29.7916
		51.9158	33.2988	85.0913	43.7683	41.9055		154.114	70.506	74.9956	69.3159	14.4062
		0.22946	0.0681299	0.295744	0.717086	0.354818		0.267374	0.724773	0.562421	0.372718	0.0391598
	Sucrose	-47.4295	405.211	-25.929	42.4506	93.4132		-73.5409	-8.4931	249.207	-78.4867	-37.6988
		47.3072	37.8796	165.648	103.374	27.0848		181.42	136.23	88.7053	145.093	69.9716
		0.147975	0.00726767	0.778774	0.635921	0.0402054		0.268151	0.921779	0.120276	0.161692	0.406724
	Glucose	-32.6749	26.9651	-15.1622	6.00298	41.3177		-93.46*	-77.6369	-67.4202	-87.0494	-84.0549
		30.2306	52.701	49.005	47.4011	17.9548		36.7969	35.0429	55.0558	40.2798	21.6232
		0.184821	0.602884	0.707812	0.885487	0.0811109		0.00319121	0.00415605	0.0628468	0.00379129	8.33807e-05
	Ribose	74.8537	7.87189	-9.52991	7.53232	83.0832		16.1576	204.133	39.471	11.2579	-0.033402
		34.1341	30.7087	40.0923	34.5026	27.6361		43.349	14.3006	20.639	16.6055	24.2875
		0.105766	0.791254	0.785796	0.814621	0.047907		0.698815	0.000409526	0.150897	0.525643	0.998824
Others	Phosphoethanolamine	16.2346	62.3799	-6.69074	-9.40921	-7.62354		-21.8768	-17.3824	-44.0291	-60.7567	-51.3123
		35.6849	38.3955	33.9123	17.2032	37.4833		65.958	36.9605	24.4677	24.0239	37.8985
		0.639547	0.210014	0.827814	0.556507	0.811588		0.651502	0.570294	0.0568957	0.0122096	0.0663686
	Hydroxylamine	10.116	28.9763	-21.7548	3.71618	20.7187		-74.0272	9.48343	34.5842	-16.4004	30.8399
		10.5312	9.08962	34.7116	16.1366	29.4977		165.559	52.6022	26.9188	15.681	20.8874
		0.373008	0.0430355	0.470671	0.815428	0.49379		0.239608	0.838733	0.280755	0.286179	0.206233
	Taurine	-4.29943	163.109	-25.0614	48.9629	73.8755		-99.0237	-99.719	-99.6318	-99.4997	-98.5532
		77.0056	47.4981	46.7506	37.0105	39.3576		172.201	63.2213	283.566	274.482	240.302
		0.941156	0.0675455	0.50659	0.252574	0.146601		0.0098603	7.11762e-05	0.0140459	0.0159661	0.0134874
	Lactic acid	0.508332	4.5677	44.1019	24.5034	41.8657		-12.2173	103.178	188.053	-64.2244	84.7313
		26.2122	24.1632	30.4682	39.0746	38.5674		18.8326	48.0684	29.5253	151.532	10.0069
		0.983329	0.846578	0.263184	0.531094	0.324884		0.492162	0.130722	0.0149814	0.327555	0.000665987
	Adenosine-5-monophosphate	81.2375	134.135	-42.5487	25.6318	-65.1981		-41.9813	-63.9662	-1.75808	-12.8406	-74.5387
		42.0332	54.6746	136.208	68.4744	186.132		14.7273	192.871	27.9449	29.1311	105.757
		0.141077	0.122883	0.564972	0.677085	0.354132		0.0166423	0.385791	0.946076	0.619394	0.10676
	Inosine	38.6328	359.707	28.2732	-13.6707	225.49		-31.3836	-43.7106	-18.4802	-37.0158	-61.4103
		16.5462	30.8623	62.4518	37.4582	10.2461		34.9613	75.1119	31.4813	26.617	48.5809
		0.0768495	0.0047686	0.643237	0.660324	1.93671e-05		0.277399	0.352063	0.496828	0.121712	0.0529508
	Phosphoric acid	-8.22483	-59.2092	170.481	-35.9731	-24.2168		1.97045	-6.52956	-11.3117	40.9055	-18.3649
		35.9721	16.1193	128.961	61.0823	44.4417		14.6273	19.4745	4.21929	25.6515	14.5505
		0.78938	0.00388208	0.315867	0.385765	0.479318		0.893253	0.719903	0.0439109	0.207563	0.185871
	Glycolic acid	20.5332	36.3072	-31.641	15.8949	-17.5795		25.2907	58.2696	238.891	-66.4804	174.54*
		88.6697	36.3882	58.8546	45.1399	38.3568		101.558	96.1381	55.4626	232.228	26.7416
		0.77853	0.374723	0.471362	0.705817	0.573275		0.763804	0.525801	0.0505315	0.414123	0.00800252
	Inositol myo	-34.4085	101.134	-23.8978	19.8258	45.833		-82.61*	-68.6333	-80.0062	-90.5243	-84.8022
		38.6812	46.3833	73.9879	71.8459	39.4128		18.1679	38.0017	6.48318	10.829	44.7967
		0.24465	0.140599	0.655772	0.749702	0.299479		0.0018549	0.0155494	1.37729e-05	2.1474e-05	0.00224391
	Phthalic acid	19.6525	19.9451	-17.8517	-40.8731	22.5185		17.2058	31.3949	22.8683	-22.6821	81.8518
		25.6862	34.2051	20.9308	60.9917	21.904		34.9364	9.58988	30.5648	13.2209	55.8533
		0.462418	0.569927	0.3769	0.312077	0.34473		0.62426	0.0307441	0.483091	0.107024	0.226422
	glycerol-alpha-phosphate	-29.7268	108.345	17.812	-28.7619	-8.69077		5.49649	48.0834	30.3349	-14.3911	-51.2127
		26.3767	107.713	118.743	60.524	33.1156		53.5771	40.1869	13.4483	26.7388	52.0163
		0.182535	0.37212	0.847534	0.500556	0.761375		0.906764	0.297601	0.103685	0.547796	0.137427
	adipic acid	56.8467	18.9937	7.99159	-28.6044	18.7573		1.8866	-2.3558	1.00413	-24.9996	28.8562
		42.0951	20.7177	57.2829	39.3765	46.0985		72.2141	40.2242	18.7153	38.9263	24.1747
		0.24743	0.407963	0.875996	0.349346	0.666157		0.974218	0.946516	0.956352	0.430968	0.286024
	2-hydroxyvaleric acid	33.0708	54.6686	23.2297	1.28469	-4.65554		18.7977	19.9017	-15.4726	-28.2167	208.797
		26.8734	17.2767	78.8571	26.4041	12.8529		30.7908	28.6343	18.9992	15.9739	44.693
		0.275235	0.0520896	0.743199	0.958323	0.70701		0.55599	0.503309	0.38859	0.0889139	0.0224564
	222295	-39.8015	-70.0482	-38.8578	-46.1859	143.168		-61.1502	-59.5365	158.79	-80.8642	35.4057
		83.7042	133.448	83.5496	194.588	65.9137		60.0248	154.076	29.5949	53.2487	86.6907
		0.435944	0.228082	0.477192	0.58713	0.129779		0.114674	0.376461	0.0214332	0.0179385	0.644524
	222285	-27.5871	-49.9908	-73.6627	-17.9686	164.928		7.09169	-29.3173	319.865	-89.4251	-12.9226
		68.2261	38.8123	107.725	119.153	59.2893		65.8361	77.9423	56.4573	69.8172	73.451
		0.557699	0.102144	0.165487	0.809123	0.0812877		0.898798	0.573382	0.032733	0.013236	0.81
	222237	-13.2257	99.1087	67.4468	-38.2816	9.11472		-46.0393	83.4718	-0.82033	-28.8056	73.7187
		33.252	67.1932	116.367	104.868	56.6089		54.7146	226.031	100.916	44.671	55.0418
		0.638762	0.251332	0.551982	0.526075	0.852235		0.230365	0.629466	0.991146	0.409626	0.254669
	222235	22.4458	105.866	-63.0312	2.29738	-45.2241		-57.1897	-12.7273	7.31178	-61.0559	-41.8328
		54.185	81.2946	40.6367	115.011	119.593		78.3856	210.159	98.7923	64.1691	55.0921
		0.656515	0.291645	0.0615913	0.977292	0.473159		0.216571	0.908955	0.923139	0.129887	0.263098
	222234	11.2789	20.4118	-58.6074	-32.2873	345.532		-57.1576	-68.7577	209.732	-64.1485	33.1397
		88.4915	111.221	19.5788	119.924	102.278		88.5012	171.456	50.4378	150.199	130.956
		0.871655	0.816047	0.0159706	0.638387	0.0781882		0.25216	0.296575	0.0504164	0.325979	0.744049
	222233	306.265	-20.6667	-30.7979	5.71291	-50.9636		0.781295	-18.455	3.8835	-39.5964	24.5845
		66.0686	31.4444	54.7268	108.618	72.4178		136.977	131.299	178.902	98.5336	141.428
		0.0326935	0.444824	0.460938	0.942231	0.238705		0.993235	0.817441	0.972149	0.503053	0.811377
	222214	146.634	59.5822	-37.273	-13.8657	24.0406		168.655	25.4788	69.477	15.8715	89.321
		27.8847	28.7546	34.3683	43.4519	32.6705		80.2972	43.5718	48.2578	10.9789	24.9385
		0.0104509	0.138101	0.212514	0.693499	0.474892		0.168924	0.557834	0.251393	0.23022	0.0285505
	222199	-9.16008	262.31	-61.2542	-53.8375	-66.73		128.485	-42.9824	10.7542	44.6835	-36.8199
		40.918	102.62	60.2446	116.735	50.15		96.322	97.2966	78.9351	50.5679	72.5031
		0.788818	0.142381	0.137879	0.356208	0.0352215		0.287811	0.446024	0.869178	0.417783	0.431982
	222197	40.7316	-46.2117	42.4268	-41.8487	-80.4495		-70.0986	161.31	25.5884	1.36167	-5.55112
		21.4262	50.0343	87.42	111.368	64.7167		45.3685	37.1354	21.5994	31.5801	56.0301
		0.128892	0.201108	0.612776	0.496115	0.0170235		0.0320634	0.0286976	0.308738	0.963058	0.902047
	222196	-0.161058	173.976	-9.73048	-57.4158	-7.65472		-23.846	-11.4369	437.32	-83.1622	-2.48956
		59.0291	116.994	54.9245	59.1001	41.5805		118.042	95.1579	131.18	125.232	113.599
		0.99734	0.263147	0.830154	0.115633	0.826448		0.744363	0.862995	0.11527	0.0932616	0.974578
	222194	-25.6061	-22.1742	76.8058	55.3721	19.0703		-75.3569	125.763	7.76114	-37.3118	118.082
		35.1205	57.7423	52.0677	37.5163	34.4108		26.9535	53.5618	32.2355	59.0412	85.8463
		0.363695	0.61157	0.267124	0.215869	0.576586		0.00986558	0.116091	0.802302	0.371131	0.255101
	222193	-35.636	-12.6903	134.967	-28.1265	164.663		28.3737	68.0905	66.2408	-52.0155	11.3429
		32.8214	33.3434	122.432	58.9206	35.8659		54.6784	59.6322	92.0567	37.2578	42.8567
		0.171562	0.661781	0.363607	0.502649	0.0191846		0.597536	0.317356	0.479594	0.0812578	0.773398
	222172	-2.30628	-57.4132	18.9184	-71.8115	182.346		-35.7331	-37.0057	290.456	13.166	72.5677
		70.221	105.94	252.264	203.88	55.3109		64.6505	167.132	47.3698	113.824	43.5421
		0.966436	0.302804	0.899272	0.298022	0.0564676		0.425366	0.657926	0.0246113	0.878608	0.181911
	222169	-14.6037	106.686	-48.0627	-54.0689	-51.4753		28.0126	-42.6679	9.23851	13.0473	-42.1799
		45.9676	118.821	34.4892	82.011	39.1085		83.0191	100.575	56.7943	53.135	60.251
		0.690908	0.406331	0.114001	0.241594	0.0710112		0.70377	0.460398	0.853823	0.787812	0.289468
	222154	-8.84108	57.9704	-29.3785	-66.5596	26.4017		3.54439	205.12*	148.198	42.8919	2.90731
		61.3782	109.991	118.502	111.322	67.0097		48.742	51.7343	84.1165	61.1448	74.9922
		0.853013	0.571035	0.686459	0.193523	0.663872		0.934312	0.0554959	0.21065	0.496014	0.960817
	222152	-4.74093	222.732	4.3849	-42.714	-42.7259		-18.2433	-17.3897	-11.7874	-32.1036	-71.5213
		60.1469	66.8992	154.583	78.7634	50.4985		17.4404	99.6501	22.707	11.2535	145.967
		0.921214	0.0840973	0.966256	0.374562	0.221705		0.278476	0.793371	0.573068	0.0221452	0.212317
	222151	-48.3336	30.1633	-25.9023	14.3371	65.7956		-1.05583	45.8321	27.9291	-38.6781	-7.66527
		28.7998	30.5953	51.4646	24.3182	22.64		31.5161	25.5271	13.6005	23.8856	34.3608
		0.040163	0.379263	0.522451	0.560823	0.0479773		0.970951	0.157914	0.125592	0.0844886	0.796199
	222115	-42.6479	-14.7082	-33.4329	-30.879	-26.8486		-74.0114	98.4807	-49.2033	-51.6507	38.0237
		74.4995	100.551	44.1668	53.0565	58.7946		63.2686	53.8526	54.7236	39.6366	92.7119
		0.356552	0.830382	0.347041	0.41892	0.52419		0.05144	0.172442	0.195646	0.0951021	0.640718
	222103	7.92635	-12.8427	-14.0588	-19.959	17.9349		50.579	-27.8009	-17.2617	41.2591	32.57
		25.483	45.97	150.139	59.4288	74.9083		55.6502	63.5093	52.7403	66.0933	76.1376
		0.748288	0.734685	0.879257	0.650029	0.777895		0.407257	0.536973	0.677772	0.533366	0.636179
	222102	-17.2887	95.6655	22.9189	-24.7921	-3.15016		4.72377	39.7581	-16.1104	-44.5028	32.9663
		14.7956	42.656	80.3374	41.6237	23.643		25.77	26.3762	31.4875	18.3671	45.7842
		0.218081	0.131843	0.7495	0.444244	0.88506		0.850283	0.212123	0.555973	0.0250753	0.478349
	222101	67.8173	29.7899	-23.7446	36.2464	12.2654		45.6591	9.18584	0.040202	11.9931	52.3874
		15.3369	18.0506	69.0092	13.3896	32.6259		31.917	18.3738	14.5855	53.2191	47.6738
		0.010988	0.191209	0.641129	0.0490283	0.696223		0.246089	0.624608	0.997786	0.803782	0.321385
	222099	-14.0789	-9.97709	112.698	63.2954	44.164		-31.997	168.687	-52.5462	-36.5513	-9.93185
		24.0306	51.1816	34.2872	54.5728	34.7992		20.1902	25.9979	22.1963	22.4118	32.5177
		0.507476	0.8118	0.0832176	0.303157	0.266508		0.104025	0.00788649	0.0205007	0.0876731	0.723007
	222098	1.96306	22.1371	189.628	-20.3397	-48.3557		-1.72549	-27.0253	-28.2202	-51.4682	42.9477
		47.0267	15.3127	66.8236	65.9059	85.4264		19.4408	86.1511	77.0772	86.6942	27.191
		0.961412	0.233122	0.129255	0.669068	0.32571		0.926665	0.633703	0.592861	0.311292	0.187938
	222097	-28.7924	-27.3633	-68.2157	-8.12029	44.5401		62.1838	-32.4368	256.993	-29.6816	25.1851
		32.1427	35.9793	122.108	83.5896	99.2337		95.8405	151.093	42.8005	37.6437	54.5897
		0.268818	0.35697	0.24643	0.893696	0.612258		0.511659	0.687891	0.0233387	0.33225	0.624535
	222096	-31.2828	-7.03359	45.3298	-57.0409	-20.8811		14.0418	-25.4139	111.513	-34.789	111.791
		41.9448	119.278	47.531	122.064	73.3974		35.6644	126.654	72.6183	20.4625	61.3397
		0.325309	0.93046	0.407298	0.330328	0.685291		0.688823	0.73472	0.241912	0.0832555	0.16774
	222094	120.514	-1.65939	-14.7709	-7.25327	39.2807		5.54548	68.049	-4.62168	8.94679	155.354
		31.7473	20.8198	19.5678	42.81	24.931		34.362	25.5768	35.6544	32.9497	19.0964
		0.028496	0.933752	0.437046	0.839643	0.187197		0.863899	0.0716084	0.884199	0.7785	0.00172109
	222093	17.6776	-10.3056	31.7401	18.8614	31.3419		-6.03073	128.549	52.9395	-26.8417	21.9248
		20.7156	34.647	19.607	28.0949	37.3863		39.0405	63.7424	13.6021	28.6191	48.2652
		0.420467	0.733174	0.221279	0.511397	0.423658		0.859498	0.154545	0.0290651	0.282147	0.632661
	222092	-10.2557	-10.3419	36.3897	-15.2512	17.5912		-5.87281	35.056	25.1444	-25.1122	26.7646
		24.874	30.9533	25.687	20.3201	28.1248		27.9705	26.6521	20.4939	55.1616	30.959
		0.643459	0.706328	0.26773	0.405481	0.537454		0.818222	0.25935	0.295267	0.54632	0.41306
	222088	30.4455	-33.3348	26.1222	-68.4147	460.77		-21.2382	33.7295	66.2879	-32.2309	-1.96459
		68.8259	9.50841	45.1953	128.584	58.8871		21.5787	186.543	48.2629	33.4683	38.1166
		0.629903	0.0111243	0.577808	0.212752	0.00980991		0.288839	0.793525	0.266157	0.249036	0.953002
	222086	95.1813	16.8058	-0.133046	-2.73165	33.1346		13.7205	21.4698	2.91217	-9.02914	-7.72203
		31.8894	14.2625	28.053	21.8837	14.959		26.4799	33.0273	20.7663	17.558	24.7888
		0.0521398	0.308719	0.996042	0.893276	0.0858922		0.613262	0.525822	0.886446	0.589957	0.729123
	222067	-35.0803	-51.2761	56.7939	-20.1777	250.102		-77.2188	456.881	-46.9126	-52.4877	-54.2086
		28.1857	69.5692	43.9287	118.334	58.3931		52.7269	70.3757	49.4016	60.6687	107.259
		0.13254	0.244998	0.304702	0.782588	0.0344335		0.0250538	0.0233946	0.189863	0.191632	0.325047
	222066	-54.5805	-46.0388	32.7293	-7.73675	34.2856		30.8038	-30.1446	179.964	-47.1894	-16.7599
		24.0186	94.701	67.871	57.111	27.6377		8.41329	130.487	76.5379	26.5552	42.5744
		0.0104996	0.406915	0.622698	0.864402	0.272474		0.0292644	0.685357	0.144326	0.0534831	0.623534
	222065	-7.55028	15.6546	36.0599	-44.8225	25.6978		-0.853944	38.8766	6.99226	-45.2515	68.1993
		25.359	20.7769	22.4846	75.7924	27.1667		65.1729	17.2926	15.2142	38.2315	70.769
		0.740188	0.484023	0.226248	0.332452	0.378015		0.987183	0.0945516	0.658104	0.13629	0.368742
	222060	63.2261	119.631	-17.5868	12.9202	-58.5044		3.83053	-18.1109	1.40511	-31.4244	-51.2812
		54.6877	55.174	85.4566	32.4478	106.887		85.5317	34.5589	56.3383	23.9678	76.2255
		0.30429	0.147836	0.774667	0.680563	0.271827		0.95442	0.530722	0.976585	0.153973	0.251388
	222059	37.8694	22.7	24.1399	13.8007	30.8177		35.0476	55.2892	21.2371	-21.6321	45.3651
		25.9914	11.1806	31.2098	18.631	24.0609		35.3663	13.6873	15.6864	11.4195	35.006
		0.213922	0.125789	0.484156	0.477885	0.259218		0.377257	0.0186176	0.256813	0.0872341	0.259103
	222058	-34.3877	-21.9518	64.073	11.1107	15.5682		-36.9995	230.202	-26.311	-42.8473	-17.718
		24.499	32.9373	14.8525	19.7232	32.8483		23.2317	59.0399	11.1558	19.0093	43.576
		0.102821	0.433141	0.0374036	0.579693	0.628654		0.0914465	0.0497622	0.044706	0.0324463	0.609172
	222056	-53.9624	53.3998	-19.6481	-14.3116	163.794		-54.4109	-46.6679	69.2424	10.4913	14.4512
		53.3182	85.0246	156.094	115.152	26.9805		61.9701	161.704	83.0328	116.713	51.8832
		0.119414	0.525103	0.83102	0.846899	0.00664377		0.178676	0.542329	0.433193	0.903586	0.757684
	222054	27.7958	27.4937	-8.9752	-3.53296	20.1203		-4.53942	10.4622	-12.8575	-15.3264	50.3819
		31.408	25.277	46.0106	15.7789	36.5848		32.8642	16.7242	21.5461	23.8164	17.4777
		0.403803	0.341773	0.819827	0.814251	0.577978		0.878061	0.548286	0.519515	0.47962	0.0445008
	222051	-28.6699	13.5341	80.7088	7.83353	27.1795		-60.7685	65.3457	-42.8422	-18.49	-14.8209
		14.4801	10.1037	32.1088	15.6586	34.9427		79.4183	37.7819	7.36043	25.5433	23.0737
		0.0466336	0.257686	0.123596	0.62271	0.452983		0.184696	0.177439	0.00140497	0.419604	0.469058
	222050	19.2448	-1.00884	61.0153	15.6834	-2.41193		-17.3672	42.9721	244.085	-24.2694	-18.0359
		46.8165	60.463	152.103	54.845	31.3014		58.8078	27.4449	67.2482	21.5599	62.0513
		0.662842	0.98392	0.642012	0.750328	0.93148		0.701165	0.20047	0.0741407	0.227592	0.694656
	222049	9.2864	20.1274	-0.617568	-2.50547	15.7829		85.1999	139.673	-33.6356	-11.2093	14.0464
		32.3199	17.3383	34.6678	45.7231	17.3803		67.6674	28.57	20.721	17.9574	39.3066
		0.761919	0.315354	0.984702	0.948463	0.395719		0.298993	0.0176912	0.0950324	0.511427	0.705469
	222047	36.564	29.3162	73.1586	69.3094	36.837		-9.40064	179.391	-10.6973	-59.6983	68.9083
		112.121	31.1082	17.5922	34.3872	25.6113		73.3064	30.66	40.5534	60.884	57.9089
		0.692989	0.396274	0.0428375	0.125101	0.218151		0.866248	0.0120999	0.756311	0.128576	0.294902
	222043	73.6209	36.0796	1.62051	-11.8541	23.7454		62.7804	45.9942	-3.14981	-8.72089	71.4148
		18.3175	16.0197	31.6415	13.179	28.1476		44.1644	18.0911	19.2085	19.4861	17.5503
		0.0168224	0.106832	0.957048	0.347434	0.423298		0.253681	0.071935	0.864322	0.635275	0.01575
	222039	-5.52893	14.6306	8.8232	-48.2796	25.3913		6.24588	38.0268	-5.86503	-45.0202	104.007
		23.3976	9.59109	28.7874	74.9656	26.991		51.9431	23.7807	21.7338	21.7577	52.349
		0.795818	0.210251	0.760217	0.283185	0.380225		0.891853	0.191276	0.773932	0.0384517	0.141295
	222037	48.1593	25.3191	-8.83612	-1.52542	24.8937		57.5581	4.16357	-8.12881	-9.67711	74.5897
		26.7525	12.9314	44.5749	15.127	22.0056		39.5198	30.2427	29.8458	34.2703	19.4933
		0.148337	0.137054	0.818051	0.916663	0.306468		0.243963	0.883347	0.761738	0.747204	0.0203468
	222036	142.979	106.461	-43.1373	18.7777	53.7323		118.938	-27.5777	73.1124	-5.77191	71.8601
		49.5478	32.9723	134.974	19.9221	40.6377		43.3818	55.7002	31.489	34.2723	18.0529
		0.0695229	0.063715	0.55595	0.380099	0.254102		0.0953117	0.498852	0.115506	0.849966	0.0171873
	222035	-9.66526	-37.415	57.7056	5.36621	8.07314		-35.0533	75.4734	146.475	-15.564	36.7342
		33.75	38.3526	25.0041	28.7114	29.0614		32.7388	37.2681	44.8094	72.1348	56.2053
		0.738623	0.222338	0.133885	0.842784	0.771161		0.202197	0.136037	0.0714818	0.770982	0.509273
	222029	190.721	65.9779	-52.9323	-18.3062	88.4924		-21.6477	-32.8118	270.025	-1.80219	23.6402
		47.1854	44.2121	87.9722	57.2235	69.4715		25.7983	43.8472	65.5681	64.7952	43.6311
		0.0328102	0.238585	0.318271	0.670671	0.274773		0.347723	0.32393	0.0603689	0.972703	0.579187
	222022	-10.9872	-7.74234	2.52166	-34.5991	48.5012		-34.8181	53.2946	3.45199	-22.4111	-4.47109
		22.7517	31.2407	53.8016	85.4944	37.2757		22.4659	20.8844	12.0737	16.2616	36.9751
		0.590784	0.781664	0.957506	0.517581	0.258493		0.102279	0.0740586	0.780731	0.16745	0.889171
	221670	26.4305	18.4998	44.0406	45.2638	28.4728		-40.8748	46.5139	138.406	-34.3538	16.1471
		22.1833	7.40086	34.5971	32.1877	31.3338		79.0504	18.0266	22.3013	22.584	22.0167
		0.286161	0.0762055	0.306933	0.229364	0.393446		0.417979	0.0693801	0.0124908	0.107598	0.480363
	221619	61.6238	36.6789	-19.9113	-10.8942	-2.6758		-3.99131	7.45821	-24.8961	13.9017	48.6335
		26.5047	26.3192	47.6933	30.1648	18.742		16.8228	27.0862	39.0357	28.7288	36.2013
		0.0871988	0.252086	0.608946	0.677038	0.879724		0.80629	0.776179	0.434016	0.63343	0.246912
	221597	40.9079	19.8708	2.10716	16.3308	24.4172		31.4975	53.7052	11.3408	-37.1302	91.51*
		20.6591	14.5258	26.3581	15.9293	24.8326		32.1277	15.1431	15.4064	16.0749	14.784
		0.117625	0.252398	0.934593	0.345599	0.362675		0.381332	0.0284705	0.495115	0.0357528	0.00527863
	221589	11.0521	3.99189	-74.4733	-28.3393	266.679		-47.0906	-73.183	27.6368	4.86391	-31.5784
		116.188	117.247	137.691	84.2432	168.022		73.4666	103.893	20.6869	28.8049	37.1895
		0.896293	0.962182	0.212872	0.605208	0.235617		0.312127	0.123962	0.264146	0.860304	0.27531
	221586	2.54102	-32.2314	191.896	18.9183	35.4746		37.0033	210.425	56.6474	-14.9018	4.14252
		96.9686	24.7962	103.787	47.8959	19.8987		60.7182	92.5308	120.393	50.2141	84.5553
		0.971672	0.153856	0.229451	0.67346	0.145353		0.543277	0.144341	0.600425	0.711927	0.949339
	221578	31.4865	30.4427	9.03332	-22.7158	34.4728		32.5687	-1.03461	-10.1813	14.5757	71.75*
		19.4139	10.5891	30.6005	15.3957	20.8664		39.4839	17.3797	15.2908	29.4733	9.84064
		0.173819	0.0575545	0.767253	0.122038	0.169108		0.444598	0.950768	0.492454	0.626218	0.00221045
	221577	-40.6106	17.3208	-16.568	-57.737	11.1637		-54.5995	33.3938	-37.5368	-1.50194	10.8097
		30.6943	20.6595	52.8546	47.7806	29.206		75.0797	27.4929	26.9967	39.1726	32.6137
		0.0995431	0.442919	0.69824	0.0696021	0.693939		0.231376	0.288804	0.120296	0.965678	0.728598
	221575	-23.3608	19.8139	-32.1121	-50.7172	126.577		3.83825	-29.7151	-28.9551	-30.6427	0.121923
		77.2987	16.7999	37.7109	71.3575	50.4588		14.7407	101.049	47.0112	27.426	26.6232
		0.658598	0.309097	0.312791	0.236906	0.0921524		0.797714	0.635087	0.425114	0.205631	0.996049
	221574	-50.2152	-3.85952	-22.6466	-10.7184	42.4222		-54.3588	40.7396	-59.4368	-23.761	-37.6922
		22.2076	48.146	47.565	12.642	20.8203		17.8393	35.0361	11.071	15.9541	26.7728
		0.0131792	0.925048	0.55643	0.377682	0.110723		0.00878681	0.306799	0.00100751	0.140772	0.0931677
	221568	59.5135	32.7973	-13.9634	18.6684	37.8463		68.0832	14.348	67.5504	-33.7952	51.9641
		22.4367	10.554	42.3611	17.7712	17.9049		49.3218	24.1185	26.7921	10.6606	16.8427
		0.0605312	0.0474844	0.698943	0.335689	0.0992355		0.264948	0.562096	0.0953584	0.0152061	0.0361289
	221462	-5.34855	9.88919	-31.6248	5.58447	64.0094		-38.6779	22.4607	-28.1633	-26.2847	102.374
		28.1927	17.3723	88.8722	24.7803	35.1442		223.481	25.8995	24.9372	56.6014	60.1559
		0.83218	0.587686	0.592075	0.81428	0.151539		0.698382	0.419259	0.211548	0.53388	0.185094
	220384	-31.3312	15.8586	17.733	-11.3364	35.279		-46.2592	79.7001	-32.4611	-55.425	-22.8144
		21.4011	11.6977	31.9583	5.26849	16.9271		42.3129	18.7807	12.8024	20.9235	26.1919
		0.100692	0.254102	0.597464	0.0575731	0.101524		0.153234	0.019136	0.0311435	0.0131278	0.30824
	220129	2.91066	29.5554	-6.36188	-37.9739	249.984		-63.3186	-78.8722	-72.2337	-89.7234	-69.241
		59.4126	30.389	26.4577	68.3218	53.9156		139.79	36.4161	79.0531	47.2981	51.2168
		0.952939	0.384404	0.797656	0.39439	0.0271584		0.315434	0.00408347	0.0926848	0.00419354	0.0291458
	220102	-50.0332	31.7045	-3.97578	-41.7143	30.5496		-54.8725	-10.1339	-17.5316	-30.2092	-22.236
		23.1586	10.1143	39.5982	37.7506	28.4999		34.4577	45.1096	21.817	11.5079	40.7608
		0.0157915	0.0460096	0.910895	0.142876	0.328635		0.0548067	0.785637	0.384013	0.0298785	0.489725
	220031	46.4562	30.3217	-11.6737	3.71654	27.8472		52.0104	-51.406	5.82574	-17.2237	61.8123
		15.4881	8.14764	34.4851	16.1867	20.5429		45.1622	186.212	23.9616	24.5141	22.266
		0.0380417	0.0277559	0.703431	0.815929	0.23657		0.324021	0.523057	0.805104	0.437218	0.0537313
	220029	51.7449	32.5259	-24.0199	6.21519	34.7789		16.1446	27.0677	7.50939	-2.97674	29.4366
		11.6177	18.1483	20.7286	15.5374	30.4225		43.2619	7.05596	22.977	15.562	24.6442
		0.00902758	0.166568	0.240846	0.690841	0.304078		0.698549	0.0170385	0.743928	0.84471	0.285896
	220015	-10.7322	-23.0477	2.24231	-22.8969	-2.05034		6.74992	45.3852	-7.70461	-13.6673	39.6833
		25.1302	23.3004	59.1877	13.1786	35.9379		69.2768	25.259	34.7216	43.8936	43.9145
		0.630636	0.279177	0.964955	0.08043	0.948397		0.907227	0.157481	0.801227	0.706983	0.39401
	220011	33.3309	-3.19759	3.34516	31.6324	84.2218		5.34666	87.2182	166.177	-46.1351	73.3732
		50.5365	27.3905	23.306	51.7294	66.4519		74.1788	50.4573	27.5336	45.3942	28.9618
		0.508242	0.899694	0.885171	0.534228	0.275702		0.929731	0.18535	0.015795	0.173669	0.0737206
	220010	-1.25298	350.51	-65.6723	-46.8973	1.70725		28.3104	-40.6139	-2.34315	-41.3135	-17.8915
		78.8848	117.7	204.504	79.7023	64.975		112.593	119.053	33.5273	55.1963	74.5397
		0.983406	0.125116	0.407781	0.321687	0.974122		0.757593	0.53575	0.938583	0.292002	0.735502
	220009	78.1425	28.9593	-39.2671	-2.4889	25.0784		30.798	-40.8927	9.90181	12.1875	58.3602
		27.7148	10.7629	27.0961	15.8499	22.2365		57.3841	110.149	22.1293	18.6902	21.8334
		0.0562561	0.0676293	0.129026	0.869612	0.307719		0.585691	0.510558	0.661329	0.538882	0.0588187
	220007	-0.813633	-19.7487	-52.4066	-73.0236	10.8341		20.0538	8.88904	-9.72832	-35.6168	322.827
		44.7142	37.3919	30.7962	142.278	28.1772		125.532	22.3857	25.323	38.1852	196.546
		0.983081	0.526686	0.0698255	0.189213	0.693011		0.833204	0.690853	0.67376	0.245022	0.232972
	220004	226.661	200.764	81.8606	60.5542	210.92		-28.3651	-24.9746	-9.72524	-26.4243	-68.9193
		26.5935	23.8056	99.0705	47.6807	28.3183		38.3946	20.769	35.5849	26.1597	84.1
		0.00240423	0.00671373	0.448942	0.270228	0.00389426		0.362626	0.188335	0.7537	0.257155	0.104022
	219881	-19.8758	187.692	-14.8237	8.12585	56.6798		-92.95*	-65.0816	-73.1934	-82.2199	-81.7989
		31.2774	22.0059	107.766	64.1405	58.0187		70.9941	33.0232	44.8766	41.3761	34.6377
		0.446606	0.00603458	0.840406	0.879902	0.364294		0.0158827	0.0141868	0.0237703	0.00755469	0.00122831
	219829	-62.2057	-36.9851	134.978	8.77365	34.4045		-32.5495	147.127	12.5047	-57.0335	-23.0108
		37.4342	52.8691	27.1139	26.1138	56.5823		15.7576	60.2391	13.5985	37.1688	85.6302
		0.0222244	0.337725	0.0377944	0.729424	0.534113		0.0545988	0.113095	0.407727	0.0556377	0.687212
	219778	-67.9218	-64.6348	361.606	40.4366	73.7728		-70.1136	314.357	-32.4368	-60.3076	-51.7984
		62.2409	139.856	64.2565	48.9985	49.7475		85.6928	85.1046	32.3985	79.464	88.8965
		0.0570909	0.300512	0.0540452	0.427116	0.220179		0.12276	0.0690229	0.234889	0.189251	0.294902
	219505	-15.9035	-34.6946	7.47385	-8.94399	-15.9826		37.1975	-10.9503	204.01	-57.3469	54.064
		19.1013	48.287	74.3901	34.9822	53.493		23.0709	36.3689	44.1252	20.8941	81.9752
		0.36002	0.340314	0.905079	0.765348	0.698531		0.20232	0.723821	0.038327	0.0109008	0.497516
	219484	157.914	59.5316	-25.3488	-5.54419	14.0975		72.9317	-16.4007	31.5609	-17.0479	65.9378
		34.6015	33.1275	63.2841	12.5992	16.4612		53.687	43.2664	40.8428	24.3175	26.3658
		0.0188721	0.177946	0.593015	0.647776	0.420048		0.271483	0.639454	0.468043	0.438931	0.0736505
	219021	22.1848	61.7221	7.13899	18.9364	31.9595		-23.4126	-33.9639	44.9926	15.3091	-3.93013
		31.0019	21.8053	32.1459	20.4106	31.1556		105.217	62.9936	32.797	56.4564	53.9866
		0.48612	0.0714388	0.820571	0.386502	0.345976		0.729424	0.434431	0.260438	0.766227	0.929025
	218955	59.7231	22.1096	-3.29708	-19.0479	-30.9482		-19.0469	-11.4869	94.3015	-39.874	-4.41148
		33.8064	67.3456	51.5977	37.756	43.0019		38.8384	29.4305	34.1957	16.8207	58.9726
		0.158972	0.717819	0.94085	0.533931	0.340442		0.554683	0.656148	0.0868406	0.0307256	0.925636
	218893	162.069	46.6699	-1.48447	35.5761	5.82265		65.8473	-47.3181	26.018	26.3517	14.1334
		63.1115	20.0936	66.9885	18.9305	30.2277		40.8376	80.054	28.828	82.9264	23.1484
		0.0964628	0.104615	0.978563	0.129686	0.837426		0.213645	0.325514	0.412923	0.718255	0.548926
	218860	-46.4288	-49.9525	341.415	103.53	238.092		-83.5388	106.607	70.8813	-44.2747	-41.473
		13.4907	53.652	6.53081	53.1233	49.2934		86.8005	82.7978	79.3941	138.434	38.8248
		0.00262474	0.18235	0.00016947	0.146383	0.0228111		0.044686	0.282836	0.411116	0.537861	0.153596
	218835	82.6026	11.1285	28.4307	-10.7577	-21.3179		-22.2779	-10.5376	211.659	38.0529	110.464
		36.6603	7.44939	168.431	23.3736	60.7393		62.8611	39.775	47.2438	81.8514	40.1966
		0.102139	0.21587	0.816328	0.60744	0.631463		0.632591	0.752978	0.0424771	0.618345	0.0698692
	218814	23.8701	25.705	15.1408	-18.2726	38.8537		14.2986	11.627	3.42481	-24.7364	77.4135
		22.5562	33.7296	22.0325	18.952	31.3633		54.5965	18.3915	35.995	37.9902	38.6665
		0.333129	0.475246	0.529966	0.289113	0.274187		0.774324	0.543471	0.918057	0.427355	0.13001
	218795	57.7838	12.7093	7.37867	43.499	30.3441		52.295	54.5343	-5.41631	-12.2404	67.4756
		15.6556	27.3336	24.1155	20.383	21.111		39.9596	16.033	22.2352	27.7983	19.5403
		0.0201819	0.646478	0.763426	0.0994916	0.215761		0.27903	0.0327498	0.795256	0.622699	0.0277241
	218787	61.5022	42.6066	-9.03037	11.6535	4.20486		29.0923	47.7311	22.2758	-25.4972	49.0739
		16.6699	17.9558	26.4759	18.4158	27.9665		34.6964	28.063	14.463	31.6975	28.1174
		0.020874	0.0980689	0.713985	0.538484	0.872836		0.439594	0.175485	0.210772	0.345293	0.158215
	218782	60.4396	14.8652	-11.3666	-2.24837	15.4001		47.1938	86.5325	2.03901	-33.2829	71.4108
		18.8941	22.9037	43.2576	21.1763	27.2166		43.2223	15.8705	45.7913	17.4554	21.0313
		0.034111	0.538397	0.75923	0.909621	0.573567		0.342442	0.00822993	0.959869	0.0656736	0.030226
	218768	97.0799	21.641	1.58274	2.37676	61.5785		103.597	-26.0632	303.102	-14.2322	59.069
		38.9078	11.5402	23.7763	53.5819	30.724		35.23	92.3408	74.3655	27.626	18.792
		0.0845422	0.147308	0.945947	0.958118	0.123495		0.0780264	0.663727	0.0662479	0.563259	0.0357918
	218764	48.0031	22.5195	2.81957	-24.0669	23.8447		45.7354	23.7434	-7.36951	2.96638	72.2117
		22.6576	18.6718	36.6559	13.9822	21.3656		38.9751	19.8543	25.6562	28.4448	13.1021
		0.103302	0.301119	0.934664	0.0800655	0.311719		0.316316	0.292417	0.75432	0.912666	0.00449606
	218708	-10.3223	33.9837	23.2622	-44.7479	80.0798		-7.26565	31.5996	-12.8641	-49.5491	57.2498
		24.9205	24.5678	45.089	69.9252	25.1378		56.5578	16.674	22.7836	12.7795	59.0824
		0.641776	0.253777	0.613402	0.30594	0.0394192		0.874531	0.13509	0.539042	0.00471506	0.367196
	218562	49.214	72.7001	6.88937	-30.9578	28.7725		84.2532	48.8735	-16.7701	-17.6491	89.4172
		34.0544	28.0967	46.0739	18.1377	33.1649		65.6886	53.6593	26.0084	37.8469	56.3545
		0.221054	0.0919741	0.871636	0.0679611	0.411268		0.292782	0.396781	0.471622	0.577838	0.202883
	218536	308.762	-13.5734	-19.274	22.3741	87.7796		-40.126	101.844	116.478	-29.661	83.3708
		63.429	53.577	42.4625	50.4858	52.6444		21.775	37.9076	74.1443	125.404	46.8359
		0.0285643	0.750955	0.587885	0.638843	0.186858		0.0598192	0.0805914	0.236245	0.687394	0.165548
	218531	-3.25717	10.9634	36.0076	-0.644361	26.4905		32.4145	56.6645	-5.04284	21.7199	57.801
		24.1069	25.8749	25.7953	17.6842	18.8221		49.1258	20.5615	8.44039	38.1248	30.6123
		0.883169	0.674647	0.272663	0.969621	0.221922		0.521049	0.0615549	0.557827	0.575689	0.138486
	218521	33.4597	-2.45786	1.95366	-3.86215	21.2519		-4.10928	-72.4418	-51.4582	20.1974	-35.869
		17.1686	18.113	19.3552	15.7076	16.9903		70.6074	58.2207	54.2677	97.8104	55.1498
		0.118348	0.888402	0.919827	0.796231	0.265428		0.941163	0.0375884	0.170811	0.800741	0.350845
	218509	1.39653	216.733	-13.0305	-24.0882	-68.184		-5.03415	-10.4153	22.4153	-36.1318	99.7091
		27.8448	41.9904	29.7744	45.4649	54.2986		70.4499	15.9138	39.0986	29.1909	83.4778
		0.95681	0.0302602	0.629347	0.489839	0.0385189		0.927496	0.489913	0.573104	0.15492	0.297869
	217893	-2.33641	5.57726	85.1713	11.3816	-25.6844		-4.89969	86.2131	162.67	-27.8254	-26.9354
		49.949	69.9338	147.368	57.0925	22.14		77.1399	43.9177	61.5241	20.1632	60.0584
		0.95536	0.923401	0.545136	0.819316	0.188273		0.934208	0.148398	0.114264	0.150511	0.529458
	217873	8.08948	34.9061	-24.8976	69.4331	-5.26923		-19.7461	29.7079	13.2698	-24.3736	31.0248
		20.157	30.8418	33.6504	21.6549	30.8098		32.8819	23.7619	29.0502	14.0742	27.2132
		0.686607	0.32778	0.396367	0.0360527	0.846928		0.482255	0.276824	0.650717	0.101164	0.304491
	217870	15.9444	29.1871	-41.8479	-22.5926	36.7179		-2.48814	-20.9763	37.6315	-21.8101	53.6721
		36.8103	46.3658	63.3011	28.0727	32.2961		31.1516	37.7389	36.3746	20.8733	36.3962
		0.653594	0.53825	0.349679	0.340571	0.306531		0.930441	0.495201	0.361393	0.264131	0.215578
	217867	42.9189	5.43556	-9.4088	-17.0074	26.8938		45.8292	22.6364	9.72964	27.6259	58.2476
		20.8529	22.8138	37.2913	9.84303	20.3176		43.7577	14.8475	26.4326	30.1114	19.6297
		0.108336	0.809449	0.775622	0.094281	0.245282		0.35731	0.200484	0.712401	0.406523	0.0428575
	217866	14.4066	11.9648	-22.2024	23.8941	54.0388		-42.7766	132.835	415.794	-54.6607	92.9203
		14.6994	16.7796	71.3318	13.068	49.7093		95.6415	33.0283	83.9747	202.381	55.294
		0.364314	0.50663	0.672786	0.13169	0.325493		0.452315	0.0314682	0.0545988	0.514204	0.186067
	217842	51.8789	4.45938	1.12721	4.5113	39.2771		63.4994	-10.4981	11.9416	-9.94213	95.2653
		21.8402	12.6018	20.9015	25.2037	23.5111		47.0022	51.6185	19.7669	14.8195	21.9782
		0.0787627	0.731804	0.956622	0.850848	0.167715		0.270992	0.800507	0.565622	0.490778	0.0150739
	217841	37.6305	53.6546	15.8216	-35.0362	21.6378		-14.0387	4.53028	140.201	-20.4732	-43.5358
		43.4981	34.601	57.1284	17.6321	31.7617		38.7888	22.6798	87.9251	90.3907	65.2416
		0.410517	0.221827	0.766502	0.0377167	0.504262		0.668419	0.836965	0.237154	0.739991	0.2985
	217840	55.153	217.188	-16.4956	-57.0032	206.847		231.332	-56.1786	432.64	-35.3472	-7.14246
		106.152	73.8607	702.424	109.407	63.5902		141.325	65.7271	38.6214	104.76	77.8336
		0.566001	0.105179	0.936471	0.296981	0.0629792		0.245491	0.163355	0.00687728	0.575678	0.901782
	217827	9.8518	65.5463	2.522	-22.361	14.1106		14.4022	12.4307	15.0498	-49.727	91.6094
		21.1685	26.772	23.4583	71.6254	29.5047		42.0718	11.126	27.8225	46.7748	74.9175
		0.641964	0.100778	0.913384	0.655911	0.627909		0.721095	0.317255	0.598474	0.14758	0.288985
	217824	1.3512	-23.2457	34.3728	17.9168	13.0613		3.56112	117.578	20.4535	-41.3414	28.4413
		18.4951	25.8394	37.6613	23.6976	43.773		27.6382	14.5819	37.2871	31.7409	25.7054
		0.939534	0.313823	0.423479	0.467798	0.746789		0.892915	0.00229978	0.588601	0.125084	0.315871
	217823	54.4215	22.6663	14.2514	17.5201	36.8276		67.2183	43.6879	32.011	-15.4612	68.0719
		19.888	8.52983	21.5065	18.5762	21.37		32.9452	9.85869	28.7261	11.2526	20.7446
		0.0536225	0.0670635	0.543103	0.379969	0.156582		0.145316	0.0119394	0.333166	0.190351	0.0330992
	217820	35.6132	25.2252	-11.8302	65.0339	61.0969		-49.0744	197.255	177.413	-74.0467	63.6611
		11.1325	28.9729	54.4628	18.1337	55.8478		81.8748	33.8437	95.1405	310.787	70.5907
		0.0278347	0.426581	0.790996	0.0238156	0.323833		0.322338	0.0134696	0.201663	0.393802	0.391923
	217813	40.4584	48.3142	-22.7954	16.0886	66.1114		33.0206	36.8288	53.1281	-24.8652	71.4026
		16.6285	12.9421	47.4416	8.99339	30.7766		24.3967	17.3184	27.049	5.6809	33.6256
		0.0692731	0.0317139	0.552861	0.133922	0.10745		0.261273	0.106853	0.149707	0.00663356	0.112393
	217804	34.7779	25.2026	2.51953	16.4485	22.4323		24.6057	100.494	4.99454	-30.4368	72.8479
		13.7837	15.1074	38.7497	14.0147	35.6376		52.5415	17.5446	30.5382	12.6414	18.4749
		0.0601598	0.185392	0.944219	0.289724	0.531382		0.629904	0.00769154	0.863783	0.0380706	0.0179561
	217799	58.2752	12.7038	-4.95991	-5.52479	19.5516		16.3471	60.7517	-0.0812924	3.24393	-18.3421
		12.9575	9.94591	32.534	17.3831	29.6506		43.3248	15.8749	9.17061	15.3369	73.4426
		0.00930473	0.27575	0.868188	0.735019	0.517328		0.695631	0.0234211	0.993049	0.833926	0.725529
	217794	52.5699	27.6112	-14.8334	-5.37067	22.7497		47.5565	16.3929	8.59643	-9.36279	76.5211
		23.3897	11.5694	39.003	14.2946	24.2012		43.2282	20.5647	27.6097	21.9581	23.759
		0.091157	0.089898	0.659279	0.693845	0.380784		0.339781	0.453856	0.752181	0.646413	0.0372315
	217784	222.634	79.1439	-66.2492	-15.2063	42.6995		79.2682	-26.0068	33.5836	45.6403	253.077
		40.5608	23.6756	125.248	24.5903	25.9293		65.9824	59.9004	57.6995	66.6133	48.2576
		0.0137944	0.0517071	0.273394	0.481482	0.173948		0.313502	0.549331	0.559546	0.502306	0.0185159
	217783	52.4562	42.1986	-26.0476	-3.44661	11.8448		-10.4695	28.9424	47.6535	-33.1087	23.9601
		21.8052	13.7943	42.8777	6.4811	32.6738		24.0222	21.2431	34.0578	5.58364	22.8242
		0.0763712	0.0527464	0.459854	0.596695	0.705845		0.634548	0.244152	0.254416	0.00177817	0.33638
	216568	59.8401	-0.279935	25.864	7.6086	51.5373		-1.83515	33.8919	68.6208	-22.7984	42.4755
		40.6797	22.3505	29.9904	30.5794	19.8006		20.6874	22.3402	15.3778	23.8477	37.1052
		0.218529	0.989578	0.445042	0.792658	0.061032		0.926271	0.207418	0.0217203	0.29297	0.304844
	216428	14.3265	-7.03482	38.8228	-10.5687	10.8002		-36.1388	34.8579	71.8963	-51.6756	52.6842
		18.3239	28.332	58.0674	33.7834	29.8813		28.748	26.9402	24.9292	29.918	40.4487
		0.4565	0.784504	0.52545	0.714373	0.708417		0.150602	0.265395	0.0716819	0.0498937	0.259239
	216424	91.9641	-6.22627	11.5156	31.3937	19.3631		63.56*	70.9688	102.136	27.8395	129.871
		31.3429	7.58073	17.1553	26.1415	22.3825		12.2943	9.67366	18.8132	32.7278	20.0831
		0.0538845	0.428669	0.540658	0.284265	0.414561		0.02397	0.00213421	0.0150662	0.434629	0.00390002
	215682	56.5236	56.0916	-29.2863	-6.43366	40.1279		4.0586	58.8271	49.0294	-33.8607	71.1722
		32.4793	16.1513	18.4409	19.2923	28.14		33.4057	12.7149	38.9895	15.9748	24.9098
		0.162271	0.0409831	0.13308	0.719171	0.222506		0.896885	0.0118163	0.29226	0.0493388	0.0521053
	215504	58.9567	64.7031	-46.4266	-49.4456	-29.612		334.365	-4.42853	-48.911	-60.2806	49.8828
		151.661	60.0539	51.922	93.6181	89.6995		174.396	74.9821	138.463	169.61	76.6381
		0.633439	0.348553	0.232415	0.341695	0.603185		0.219354	0.938618	0.482766	0.404574	0.503599
	215490	88.808	-14.7139	94.8454	-10.9114	8.9949		-35.7026	49.6306	-1.90663	-33.608	-18.4414
		30.774	117.94	81.8062	28.833	73.8766		15.8802	19.0447	107.134	55.32	32.6592
		0.0556087	0.848093	0.345808	0.664396	0.881374		0.0400787	0.0687597	0.980176	0.404912	0.497858
	215355	40.5867	39.6383	-45.3172	12.7944	24.0507		65.2028	-63.3768	64.8364	-19.9887	62.8333
		25.2151	10.1791	48.19	18.5298	22.4739		52.0506	262.804	37.2839	3.9269	20.3975
		0.180565	0.0261895	0.222427	0.505367	0.32864		0.297056	0.470973	0.189885	0.00442346	0.0392421
	214685	46.5828	-11.9921	-75.9662	0.662308	3.73066		-89.6709	-52.747	24.0135	-30.4298	-54.7632
		161.118	176.734	361.384	61.0295	132.986		74.3961	187.37	85.0345	164.996	85.445
		0.7041	0.906184	0.419906	0.989394	0.966864		0.0150745	0.509339	0.744172	0.728547	0.246346
	213961	11.9106	80.5075	60.2924	-9.30306	73.6096		77.4521	72.0578	-41.6552	-47.6871	70.8525
		16.9186	20.1811	44.6571	32.7592	16.6014		53.9851	30.6832	39.692	24.3347	68.5595
		0.498642	0.0325032	0.291168	0.742157	0.0114817		0.254713	0.0983826	0.182283	0.0409503	0.344518
	213735	42.4646	7.80206	43.4508	-41.1431	8.41769		21.1047	100.875	35.2623	-42.2059	57.1751
		24.1136	39.5417	37.7245	42.6966	18.0792		66.7048	66.3017	73.7708	48.619	59.9786
		0.152466	0.832662	0.341648	0.1866	0.643985		0.726912	0.22861	0.6137	0.238627	0.373027
	213353	-0.857916	10.4198	-12.9985	-2.63195	40.1519		20.2981	45.7167	-13.0447	-30.398	3.44705
		19.7868	7.1966	25.2248	17.3947	25.0226		33.8625	35.0501	14.7214	12.2958	31.656
		0.963485	0.226935	0.579726	0.873373	0.181412		0.560726	0.265613	0.366341	0.0353603	0.905953
	213324	3.65676	30.8765	10.9628	-2.8313	-13.8897		27.8168	0.228398	-35.2477	68.2027	58.7929
		17.2504	51.8522	108.658	29.1106	22.5366		36.3059	43.2287	24.7868	59.8371	33.2649
		0.828942	0.554558	0.896493	0.914162	0.489614		0.472479	0.995179	0.121186	0.3297	0.158456
	213318	50.9748	493.938	90.9787	16.0184	492.557		-27.4122	-11.1372	42.6742	-43.1424	-44.5914
		16.7544	17.0647	32.9519	61.7525	23.6477		66.8468	35.1558	35.2825	30.7881	35.1829
		0.0375555	0.000348612	0.107765	0.767798	0.000156898		0.565354	0.711247	0.304793	0.103234	0.0978859
	213288	0.981598	-1.14816	-18.2186	-14.789	-8.37409		77.7069	141.985	-13.2377	-24.1833	3.79559
		30.3656	30.1055	57.7341	46.8715	9.56671		167.285	31.521	15.0729	19.723	137.518
		0.97181	0.967104	0.688863	0.691636	0.375413		0.590066	0.0233288	0.36903	0.198876	0.967048
	212586	-15.7676	28.2932	-10.8401	-31.1279	37.6312		-16.3237	47.8924	19.8593	-1.82024	40.7706
		15.5025	43.0269	36.8984	48.9359	31.7765		41.0494	11.3536	11.7786	21.4865	16.3474
		0.278778	0.524632	0.739103	0.385319	0.291047		0.63169	0.0149226	0.1791	0.929344	0.0646812
	211898	9.676	24.7839	-17.8088	-7.40048	29.066		20.3371	36.0862	10.2045	-16.6463	85.97*
		33.0459	11.2461	31.8138	11.5746	22.0551		49.3578	17.8231	25.3987	15.6376	14.8755
		0.757312	0.106318	0.528906	0.508976	0.247727		0.668446	0.119089	0.689802	0.27839	0.00655659
	211889	-62.9927	-57.8778	315.384	40.6327	74.5261		-90.92	185.362	-24.2621	-35.4054	-42.8525
		22.008	72.7386	29.9479	31.1816	49.5736		477.896	68.3011	13.0759	42.9052	72.1607
		0.00245881	0.188869	0.0122208	0.255699	0.215871		0.034245	0.100102	0.086554	0.288061	0.342747
	211382	-49.1977	23.4283	-22.8184	-12.5263	-8.58146		49.3594	-18.4226	37.6119	-41.7782	47.5216
		41.8562	70.9409	181.147	71.6106	114.634		33.3313	24.6429	38.5963	48.8238	27.0178
		0.100873	0.71464	0.818332	0.812543	0.910319		0.235595	0.397722	0.38338	0.2453	0.155132
	210904	42.823	27.606	-24.2783	16.3482	28.2511		40.66	39.6352	12.3661	-5.11164	79.9221
		26.3372	9.42954	41.0063	17.2402	23.3259		34.4252	21.3901	19.8565	23.2767	22.956
		0.178191	0.0537977	0.477572	0.377864	0.280171		0.313029	0.145617	0.554813	0.814371	0.0294826
	210891	-4.44223	-15.8785	-10.0397	-39.1849	40.9962		-69.3805	-20.6082	-15.1294	-9.4955	31.5216
		75.6362	18.2022	107.282	41.0962	29.2833		94.1976	105.868	77.7728	263.585	71.8412
		0.938325	0.359562	0.893796	0.198694	0.229473		0.149124	0.762191	0.789703	0.942104	0.630841
	206919	-51.311	63.1363	-28.3783	-1.41071	93.9819		-49.2716	65.1629	-26.54	-35.9452	-39.7346
		22.7255	12.9163	51.9395	41.7004	32.7413		17.4924	8.43374	14.3634	18.5814	14.013
		0.0126011	0.0157478	0.483247	0.968808	0.0578907		0.0135849	0.00159692	0.0831128	0.059197	0.00834738
	206210	-19.6167	664.392	105.175	-21.9337	-68.3635		-50.4003	-74.9556	103.979	-73.3843	-71.1539
		79.7242	38.9374	367.663	103.103	115.899		526.429	290.318	732.055	117.015	148.38
		0.722344	0.00347291	0.673026	0.738678	0.185458		0.721789	0.355946	0.753441	0.162744	0.220784
	206022	-43.3764	23.5026	-19.8981	-5.55298	61.112		-51.5568	56.0082	-57.8696	-27.2642	-30.5661
		21.2103	10.8515	33.8964	9.13844	18.4657		10.1181	19.6223	8.84043	18.3031	25.7481
		0.0253911	0.109814	0.502472	0.537764	0.0305737		0.00167417	0.0556891	0.00051973	0.131149	0.162442
	204522	-32.4701	15.1984	19.3276	-18.3647	19.3608		-39.2451	-23.2776	-18.8832	-30.7601	-27.4107
		31.5621	18.3327	21.7555	39.116	18.6144		11.6472	51.4086	71.6831	27.8008	22.5287
		0.202321	0.44792	0.435513	0.561375	0.339818		0.0106334	0.551072	0.718319	0.208361	0.16593
	204448	-53.6492	52.5644	-8.76286	3.0835	56.3081		-46.7962	72.6656	-27.349	-38.1884	-20.2067
		20.3838	18.0129	35.2028	23.3675	18.185		16.2431	14.4209	9.91374	10.7452	37.782
		0.0060457	0.0632751	0.780948	0.889749	0.036864		0.0137778	0.00978262	0.0277837	0.00921507	0.507646
	204344	-15.0319	-43.1505	171.465	30.6312	176.271		-78.1615	191.758	121.159	-49.0903	38.7247
		47.1448	38.8739	13.5894	34.0253	58.4011		61.1102	43.2538	94.5171	158.677	74.6274
		0.68791	0.160595	0.00432554	0.39673	0.0692055		0.033208	0.0308393	0.29882	0.516714	0.578518
	203325	-2.04009	20.851	0.120896	-50.6588	42.6334		8.12209	71.1683	1.51064	-27.0418	49.0357
		10.5943	30.2933	45.8948	50.7753	30.1682		43.6653	13.8088	16.213	5.25648	29.3932
		0.844581	0.513732	0.997649	0.136159	0.226671		0.839896	0.00886507	0.925314	0.00353683	0.172481
	203250	-13.1064	34.4629	-0.486386	1.42911	21.6375		-3.96363	50.2979	-7.42182	-24.2175	31.1851
		15.3637	14.6099	31.4256	11.945	22.5303		37.8207	16.6234	12.255	11.5137	25.8497
		0.363584	0.0956462	0.986885	0.904033	0.372271		0.905754	0.0454504	0.541231	0.0636702	0.282442
	201862	-64.3608	120.2	-48.3567	-26.4316	215.363		-62.8441	2.85624	-37.6199	-30.7873	-6.60967
		95.5334	33.6986	63.6766	84.9281	57.6006		49.9554	54.8214	31.3148	73.8868	32.4476
		0.174824	0.0530942	0.272372	0.635359	0.0449893		0.0709364	0.951125	0.158258	0.542343	0.815849
	200850	-55.1278	13.8329	-9.85615	6.86165	60.6971		-51.7592	41.3327	-44.5773	-23.492	-19.0592
		27.4797	10.9894	42.3261	15.074	15.7875		17.5432	13.4678	10.4661	11.0517	31.0952
		0.0163949	0.281876	0.787933	0.653154	0.0177765		0.0107407	0.0408877	0.00405514	0.0630053	0.464505
	200624	65.7827	34.5344	8.78984	-21.6413	-40.727		42.8374	40.6251	-39.7967	-47.9006	8.40057
		75.9277	39.9039	51.7326	52.0437	97.839		64.6407	53.0151	102.254	42.579	59.0863
		0.405328	0.426894	0.852798	0.581734	0.472412		0.514076	0.459226	0.511109	0.139909	0.867784
	200429	21.1582	48.693	-38.0992	-24.7741	83.6604		-29.3787	41.2644	79.3234	-22.6982	8.31656
		40.9442	17.1622	26.5473	11.1573	25.7459		31.4705	11.1477	67.1976	19.4796	49.708
		0.59624	0.0664338	0.134416	0.03599	0.0378466		0.272523	0.0222314	0.319322	0.221562	0.849599
	200427	41.8026	37.1287	-77.0405	0.455352	28.1914		-40.2387	44.0044	89.6789	-30.016	18.7695
		53.1853	17.4264	67.1024	12.8712	30.9947		29.2982	14.3847	57.7434	11.951	59.1739
		0.444116	0.120783	0.0642676	0.971285	0.393117		0.115648	0.0421051	0.232864	0.034135	0.724049
	199786	-65.6674	43.1659	4.51551	-9.94572	35.6667		-75.1359	-56.5365	-67.5274	-81.6745	-82.8873
		63.2291	19.7777	20.7212	46.7893	28.7412		95.2867	38.2529	37.6235	26.4133	78.1261
		0.0718771	0.117671	0.829669	0.794059	0.27271		0.106094	0.0498881	0.0244047	0.00193182	0.022287
	199213	-26.0397	29.4902	-10.601	-54.5981	60.2882		-5.53318	23.2377	9.12255	-65.3645	44.5463
		31.6451	18.3419	54.5993	67.2335	25.0977		64.8909	33.5516	15.3492	36.1326	54.9792
		0.314656	0.199677	0.813644	0.175551	0.0797055		0.914867	0.502526	0.573988	0.0263569	0.432615
